1 **Natural History and Observations**

2 **A northern range extension of a Canadian species of special concern, *Dielis pilipes***

3 **(Hymenoptera: Scoliidae), in the Okanagan Valley of British Columbia**

4

5 **Authors**

6 Tyler D. Nelson<sup>1</sup>, Chandra E. Moffat

7

8 **Affiliation**

9 Summerland Research and Development Centre, Agriculture and Agri-Food Canada, 4200

10 Highway 97, Summerland, BC, V0H 1Z0

11 <sup>1</sup> Corresponding author (tyler.nelson@canada.ca)

12 **Abstract**

13 The only known Canadian records of the yellow scarab hunter wasp, *Dielis pilipes* (Saussure),  
14 are from the southern Okanagan and Similkameen valleys of British Columbia. We report a 25-  
15 kilometre northern range extension of the species, collected in an unmanaged agricultural field  
16 in Summerland, BC. This finding is of conservation importance and has implications for natural  
17 biological control of ten-lined June beetles (*Polyphylla decemlineata* (Say) and *P. crinita*  
18 LeConte), incidental agricultural pests in the Okanagan.

19

20 **Keywords**

21 *Dielis pilipes*, yellow scarab hunter wasp, Scoliidae, range extension, species of special concern,  
22 biological control

23 In Canada, the yellow scarab hunter wasp, *Dielis pilipes* (Saussure) is known only from  
24 the southern Okanagan and Similkameen valleys of British Columbia, where it is closely  
25 associated with antelope-brush (*Purshia tridentata* (Pursh.) DC.) and sagebrush (*Artemisia* L.)  
26 ecological communities below 600 metres elevation (COSEWIC 2018). The Committee on the  
27 Status of Endangered Wildlife in Canada (COSEWIC) recently designated *D. pilipes* as a species  
28 of special concern based on loss, degradation, and fragmentation of these habitats, in addition  
29 to pesticide use in adjacent agriculture land. Their report summarizes the 68 known Canadian  
30 records of the species across 14 sites (Fig. 1; J. Heron and C. Sheffield 2020, personal data),  
31 almost all of which are in the 40 km area between Osoyoos and northern Okanagan Falls in the  
32 Okanagan valley (COSEWIC 2018). Here, we report five new *D. pilipes* records from individuals  
33 collected in Summerland, British Columbia, extending its confirmed range 25 km north of  
34 previous records.

35 Adult *D. pilipes* are large, black wasps with yellow bands on their first 3-5 abdominal  
36 tergites (MacKay 1987). In British Columbia, the species has been observed nectaring on showy  
37 milkweed (*Asclepias speciosa* Torr.), alfalfa (*Medicago sativa* L.), and white sweet-clover  
38 (*Melilotus albus* Medik.), but other plants that flower during their flight period are probable  
39 nectar sources (COSEWIC 2018). Adult female scoliids lay single eggs on larvae of scarab beetles  
40 (Coleoptera: Scarabaeidae), and their larvae develop externally on their host (Krombein 1979;  
41 O'Neill 2001). While no hosts of *D. pilipes* have been documented in Canada, the species will  
42 parasitize the ten-lined June beetle, *Polyphylla decemlineta* (Say) in the United States, and  
43 *Polyphylla crinita* LeConte is a probable host (COSEWIC 2018). These two scarabs are found  
44 throughout British Columbia (Bousquet *et al.* 2013; COSEWIC 2018) and can cause considerable

45 economic damage in agricultural landscapes across western North America (Downes and  
46 Andison 1940; Van Steenwyk and Rough 1989).

47 We collected five scoliids that were nectaring in a flat, disturbed, and unmanaged  
48 agricultural field on the grounds of the Summerland Research and Development Centre in  
49 Summerland, British Columbia, Canada (49°33'45.58"N, 119°39'07.48"W) between 19 June and  
50 8 July 2020 (Fig. 1). The field is a remnant patch of grassland shrub-steppe located in the  
51 Ponderosa Pine Biogeoclimatic Ecosystem Classification zone, subzone variant xh1 (Okanagan  
52 Very Dry Hot) (Meidinger and Pojar 1991; Mackenzie and Meidinger 2018). The lead author  
53 (TDN) visited the site at least once per week between 28 May and 10 July 2020, after which  
54 visits occurred every second or third week until 8 October 2020 (Table 1). All visits were  
55 between four and seven hours in length typically beginning around 10:00 am. Dominant forb  
56 species in the site were alfalfa, stork's-bill (*Erodium cicutarium* (L.) L'Hér. ex Aiton), Russian  
57 thistle (*Salsola tragus* L.), and baby's breath (*Gypsophila paniculata* L.). All scoliids were  
58 collected haphazardly by aerial net while measuring plant growth in an experimental plot; TDN  
59 collected one on 19 June, one on 3 July, and three on 8 July 2020. We identified each as female  
60 *D. pilipes* (Fig. 2) using the key in MacKay (1987). TDN also collected one adult female  
61 *Polyphylla* from the site on 24 July 2020. In addition to these collections, TDN observed 5–10 *D.*  
62 *pilipes* nectaring nearby the site (49°33'46.65"N, 119°39'00.23"W) on one occasion in early July.

63 Frequent visits to this site detected a northern range extension of *D. pilipes*, confirming  
64 its adult flight period and providing further evidence of its scarcity in British Columbia. We  
65 suspect that the species has only recently established in the Summerland area; COSEWIC did  
66 not detect the species in recent surveys in Summerland (COSEWIC 2018) and there are no

67 specimens housed in the Summerland Research and Development Centre's insect collection  
68 despite decades of on-site collecting by federal research staff.

69 The detection of *D. pilipes* in Summerland has implications for pest management in the  
70 central Okanagan, as they these wasps may be impacted by pesticide sprays in local orchards  
71 (COSEWIC 2018). Further, the species is a natural biological control agent of *Polyphylla* beetles,  
72 therefore valuable for orchard managers who have few other options to manage below-ground  
73 beetle larvae (COSEWIC 2018). We recommend that future survey work for *D. pilipes* include  
74 sites in or nearby the grounds of the Summerland Research and Development Centre. Vouchers  
75 of *D. pilipes* have been deposited in the Centre's collection and at the Royal British Columbia  
76 Museum in Victoria, BC (to be completed prior to publication).

77

## 78 **Acknowledgements**

79 We thank Jennifer Heron and Cory Sheffield for providing Canadian *Dielis pilipes* records. We  
80 also thank Dave Ensing and the AAFC Summerland Research and Development Centre field staff  
81 for their cooperation. The Biodiversity Heritage Library (<https://www.biodiversitylibrary.org/>)  
82 supported this study by hosting historical publications, which were difficult to access otherwise.

83 Table 1. Calendar days of 2020 that we were present in the *Dielis pilipes* (Saussure) site in  
84 Summerland, British Columbia (49°33'45.58"N, 119°39'7.48"W). Grey boxes denote specimen  
85 collection events.

| May |    | June |   |   |    | July |    |    |    | August |   |   |    | Sept |    |   | Oct |    |    |   |   |    |   |
|-----|----|------|---|---|----|------|----|----|----|--------|---|---|----|------|----|---|-----|----|----|---|---|----|---|
| 28  | 29 | 1    | 4 | 5 | 11 | 18   | 19 | 25 | 26 | 2      | 3 | 8 | 10 | 23   | 24 | 6 | 7   | 20 | 21 | 3 | 4 | 24 | 8 |

86

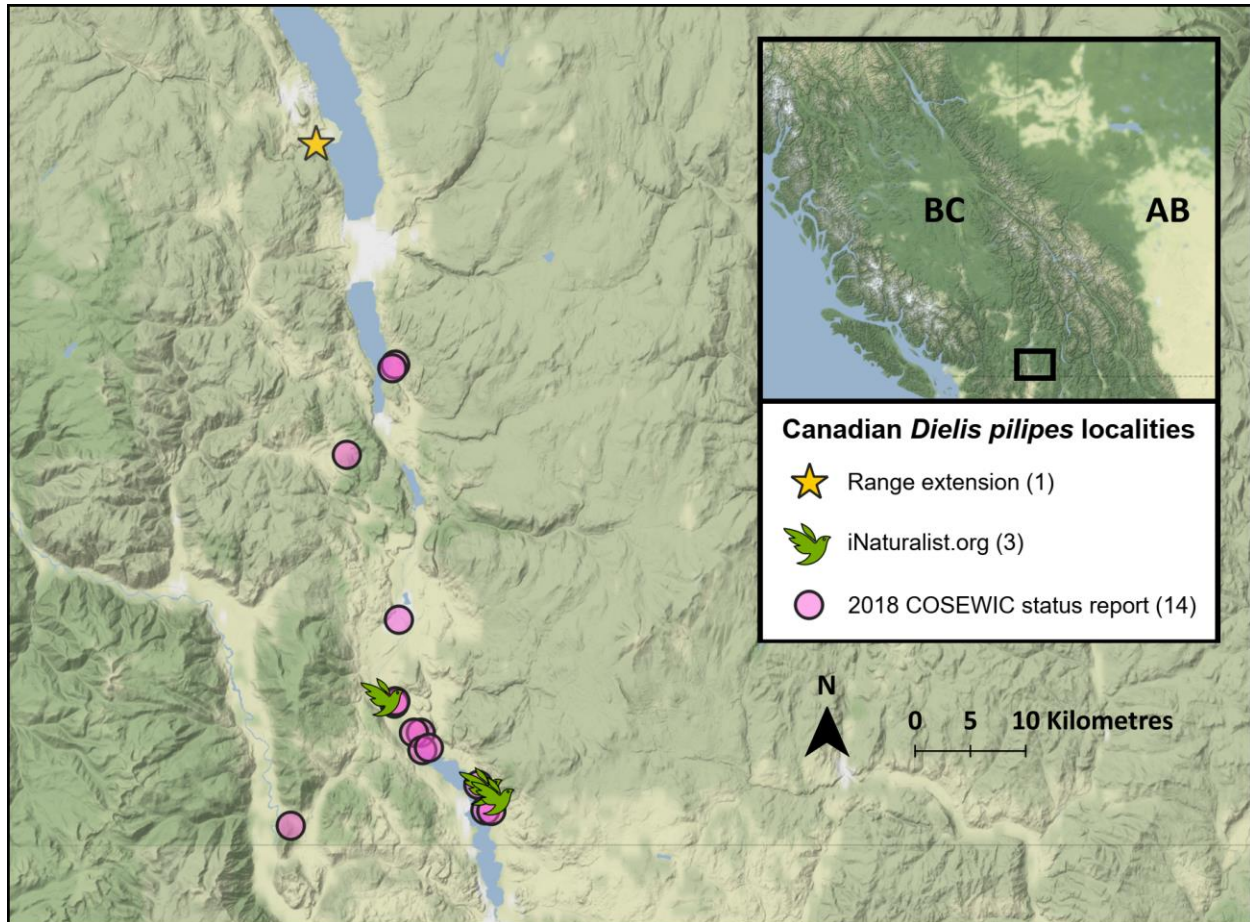

87

88 Figure 1. Map showing all localities from which *Dielis pilipes* (Saussure) has been recorded in  
89 Canada. COSEWIC locality details provided by J. Heron and C. Sheffield. Figure prepared in QGIS  
90 version 3.6.0 and base map obtained from <https://github.com/stamen/terrain-classic>

91

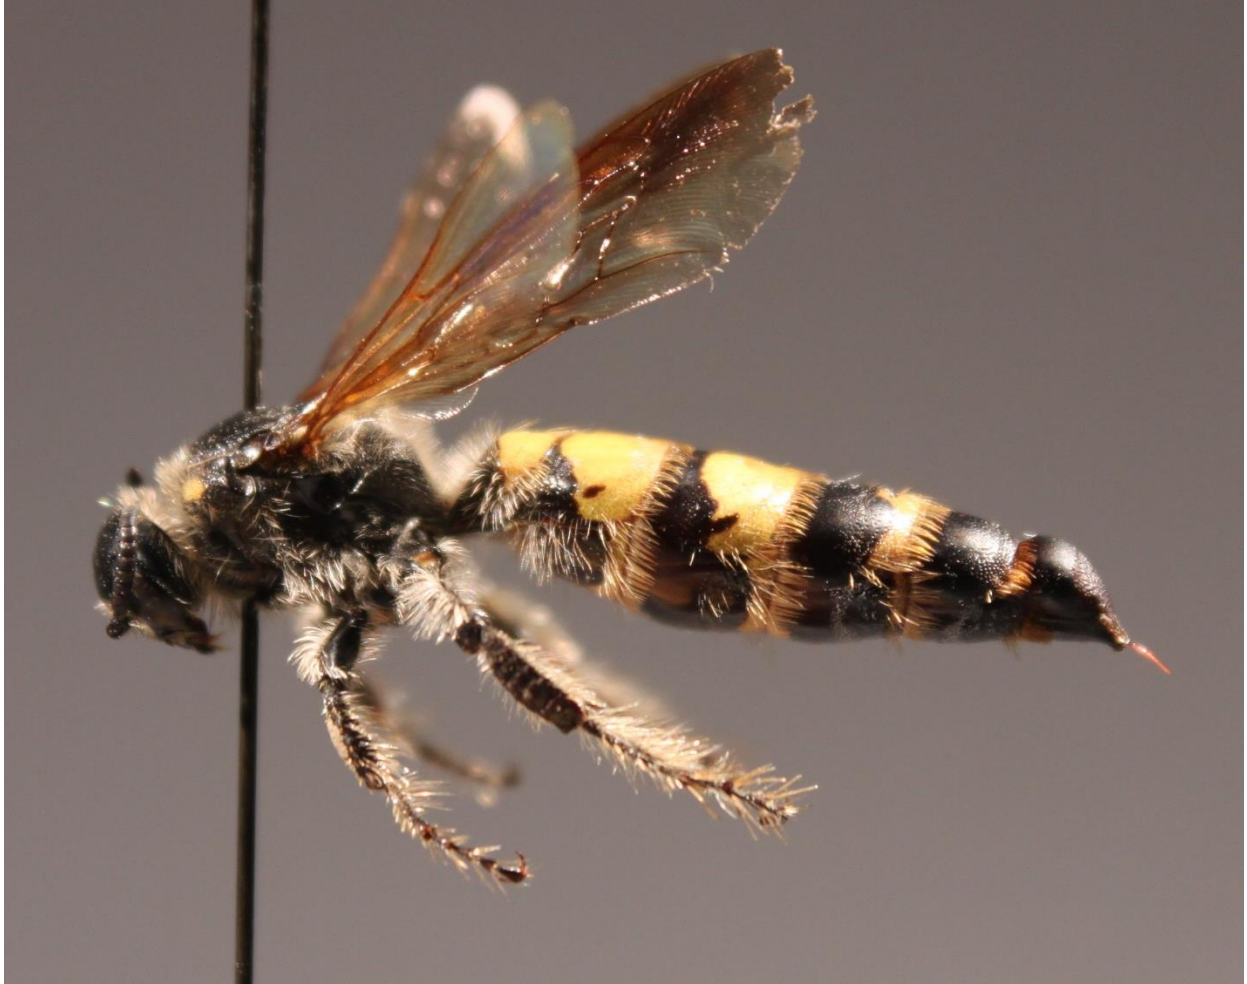

92

93 Figure 2. A female *Dielis pilipes* (Saussure) collected in Summerland, British Columbia.



94 **References**

95 Bousquet, Y., P. Bouchard, A.E. Davies, and D.S. Sikes. 2013. Checklist of beetles (Coleoptera) of

96 Canada and Alaska. Second edition. ZooKeys **360**: 1–44.

97 [doi.org/10.3897/zookeys.360.4742](https://doi.org/10.3897/zookeys.360.4742)

98

99 COSEWIC. 2018. COSEWIC assessment and status report on the yellow scarab hunter wasp

100 *Dielis pilipes* in Canada 2018. Committee on the Status of Endangered Wildlife in Canada.

101 Ottawa. x + 50 pp. Available from: [https://www.canada.ca/en/environment-climate-](https://www.canada.ca/en/environment-climate-change/services/species-risk-public-registry.html)

102 [change/services/species-risk-public-registry.html](https://www.canada.ca/en/environment-climate-change/services/species-risk-public-registry.html) [accessed 26 April 2021].

103

104 Downes, W. and H. Andison. 1941. Notes on the life history of the June beetle *Polyphylla*

105 *perversa* Casey. Proceedings of the Entomological Society of British Columbia **37**: 5–8.

106

107 Krombein, K.V. 1979. Superfamily Scolioidea. In Catalog of Hymenoptera in America north of

108 Mexico. Edited by K.V. Krombein, P.D. Hurd, D.R. Smith, and B.D. Burks. Smithsonian

109 Institution Press, Washington, DC. Pp. 1253–1323.

110

111 MacKay, W.P. 1987. The scoliid wasps of the southwestern United States (Hymenoptera:

112 Scoliidae). The Southwestern Naturalist **32**: 357–362. [doi.org/10.2307/3671453](https://doi.org/10.2307/3671453)

113

- 114 Mackenzie, W.H. and Meidinger, D.V. 2018. The biogeoclimatic ecosystem classification  
115 approach: an ecological framework for vegetation classification. *Phytocoenologia* **48**:  
116 203–213. [doi.org/10.1127/phyto/2017/0160](https://doi.org/10.1127/phyto/2017/0160)  
117
- 118 Meidinger, D. and J. Pojar. 1991. *Ecosystems of British Columbia*. Special Report Series 6  
119 British Columbia Ministry of Forests, Victoria. British Columbia, Canada. Available from:  
120 <https://www.for.gov.bc.ca/hfd/pubs/docs/srs/srs06.htm> [accessed 26 April 2021].  
121
- 122 O’Neill, K.M. 2001. *Solitary wasps: behavior and natural history*. Cornell University Press, Ithaca,  
123 New York.  
124
- 125 Van Steenwyk, R.A. and D. Rough. 1989. Biology of the tenlined June beetle (Coleoptera:  
126 Scarabaeidae). *Journal of Economic Entomology* **82**: 1738–1742.  
127 [doi.org/10.1093/jee/82.6.1738](https://doi.org/10.1093/jee/82.6.1738)
